# Supplementary figures and images for: Bile salt assisted morphological changes of cationic gemini surfactant (12-4-12) micelles
Source: Royal Society of Chemistry journal article supplement (doi:10.1039/c6ra17212a), 2016-01-01

## Supplementary Material

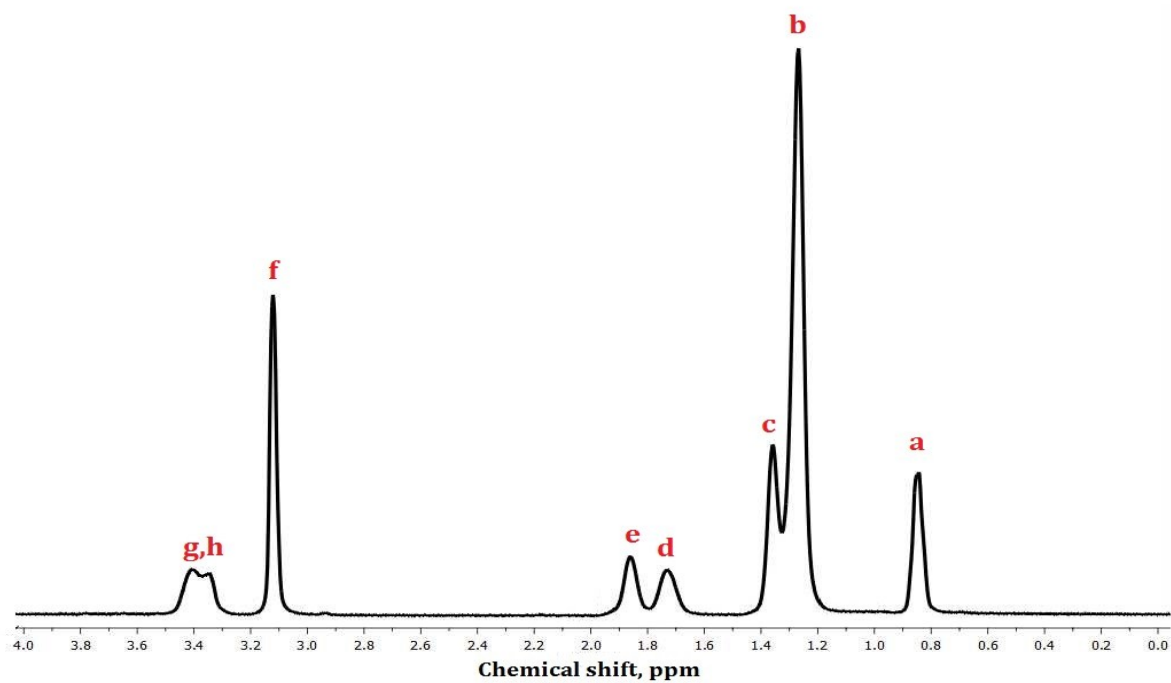

SM1: <sup>1</sup>H NMR spectrum of 50 mM 12-4-12 at 30 °C

Supplement: c6ra17212a1.pdf [file c6ra17212a1.pdf]
